# Supplementary material for: Long-Term Evolution of Activities of Daily Life (ADLs) in Critically Ill COVID-19 Patients, a Case Series
Source: MDPI journal article supplement (doi:10.3390/healthcare11050650), 2023-02-23
Supplement: s1 [file s1]

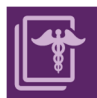**Table S1.** Barthel index.

| Activity                                                                  | Score |
|---------------------------------------------------------------------------|-------|
| <b>FEEDING</b>                                                            |       |
| 0 = unable                                                                |       |
| 5 = needs help cutting, spreading butter, etc., or requires modified diet |       |
| 10 = independent                                                          |       |
| <b>BATHING</b>                                                            |       |
| 0 = dependent                                                             |       |
| 5 = independent (or in shower)                                            |       |
| <b>GROOMING</b>                                                           |       |
| 0 = needs to help with personal care                                      |       |
| 5 = independent face/hair/teeth/shaving (implements provided)             |       |
| <b>DRESSING</b>                                                           |       |
| 0 = dependent                                                             |       |
| 5 = needs help but can do about half unaided                              |       |
| 10 = independent (including buttons, zips, laces, etc.)                   |       |
| <b>BOWELS</b>                                                             |       |
| 0 = incontinent (or needs to be given enemas)                             |       |
| 5 = occasional accident                                                   |       |
| 10 = continent                                                            |       |
| <b>BLADDER</b>                                                            |       |
| 0 = incontinent, or catheterized and unable to manage alone               |       |
| 5 = occasional accident                                                   |       |
| 10 = continent                                                            |       |
| <b>TOILET USE</b>                                                         |       |
| 0 = dependent                                                             |       |
| 5 = needs some help, but can do something alone                           |       |
| 10 = independent (on and off, dressing, wiping)                           |       |
| <b>TRANSFERS (BED TO CHAIR AND BACK)</b>                                  |       |
| 0 = unable, no sitting balance                                            |       |
| 5 = major help (one or two people, physical), can sit                     |       |
| 10 = minor help (verbal or physical)                                      |       |
| 15 = independent                                                          |       |
| <b>MOBILITY (ON LEVEL SURFACES)</b>                                       |       |
| 0 = immobile or < 50 yards                                                |       |
| 5 = wheelchair independent, including corners, > 50 yards                 |       |
| 10 = walks with help of one person (verbal or physical) > 50 yards        |       |
| 15 = independent (but may use any aid; for example, stick) > 50 yards     |       |
| <b>STAIRS</b>                                                             |       |
| 0 = unable                                                                |       |
| 5 = needs help (verbal, physical, carrying aid)                           |       |
| 10 = independent                                                          |       |
| <b>TOTAL (0-100)</b>                                                      |       |

The BI measures ten essential self-care and physical dependency aspects, rating each ADL's element. A score of 100 denotes normality, lower scores indicate increasing disability [33].

**Table S2.** Karnofsky Performance Status scale.

|                                                                                                                     |     |                                                                                     |
|---------------------------------------------------------------------------------------------------------------------|-----|-------------------------------------------------------------------------------------|
| Able to carry on normal activity and to work; no special care needed.                                               | 100 | Normal no complaints; no evidence of disease.                                       |
|                                                                                                                     | 90  | Able to carry on normal activity; minor signs or symptoms of disease.               |
|                                                                                                                     | 80  | Normal activity with effort; some signs or symptoms of disease.                     |
| Unable to work; able to live at home and care for most personal needs; varying amount of assistance needed.         | 70  | Cares for self; unable to carry on normal activity or to do active work.            |
|                                                                                                                     | 60  | Requires occasional assistance, but is able to care for most of his personal needs. |
|                                                                                                                     | 50  | Requires considerable assistance and frequent medical care.                         |
| Unable to care for self; requires equivalent of institutional or hospital care; disease may be progressing rapidly. | 40  | Disable; requires special care and assistance.                                      |
|                                                                                                                     | 30  | Severely disabled; hospital admission is indicated although death not imminent.     |
|                                                                                                                     | 20  | Very sick; hospital admission necessary; active supportive treatment necessary.     |
|                                                                                                                     | 10  | Moribund; fatal processes progressing rapidly.                                      |
|                                                                                                                     | 0   | Dead                                                                                |

The KPS is helpful to assess functional impairment, measuring a patient's general performance status or ability to carry out activities of daily living. It classifies patients according to their functional impairment and allows comparisons between patients : the lower the KPS score, the worse the survival for most severe diseases. Nowadays, KPS is used to predict the outcome of numerous other pathologies and clinical conditions besides cancer [43]. It ranges from 100 (no restrictions) to 0 points (death).

| Case Processing Summary          |       |         |         |         |       |         |
|----------------------------------|-------|---------|---------|---------|-------|---------|
|                                  | Cases |         |         |         |       |         |
|                                  | Valid |         | Missing |         | Total |         |
|                                  | N     | Percent | N       | Percent | N     | Percent |
| Barthel on discharge of hospital | 17    | 68,0%   | 8       | 32,0%   | 25    | 100,0%  |
| Barthel 1 years after discharge  | 17    | 68,0%   | 8       | 32,0%   | 25    | 100,0%  |

[illegible]

| Extreme Values |                          |             |         |        |         |        |         |        |         |        |                  |                  |
|----------------|--------------------------|-------------|---------|--------|---------|--------|---------|--------|---------|--------|------------------|------------------|
|                |                          |             | 1       | 2      |         | 3      |         | 4      |         | 5      |                  |                  |
|                |                          |             | Highest | Lowest | Highest | Lowest | Highest | Lowest | Highest | Lowest | Highest          | Lowest           |
| Barthel        | on discharge of hospital | Case Number | 6       | 1      | 17      | 2      | 19      | 13     | 20      | 15     | 9                | 8                |
|                |                          | Value       | 100     | 5      | 100     | 20     | 100     | 55     | 100     | 60     | 95               | 60               |
| Barthel        | 1 years after discharge  | Case Number | 1       | 20     | 2       | 19     | 3       | 17     | 5       | 16     | 6                | 15               |
|                |                          | Value       | 100     | 100    | 100     | 100    | 100     | 100    | 100     | 100    | 100 <sup>a</sup> | 100 <sup>b</sup> |

b. Only a partial list of cases with the value 100 are shown in the table of lower extremes.

| Tests of Normality |                          |                                 |    |       |              |    |       |
|--------------------|--------------------------|---------------------------------|----|-------|--------------|----|-------|
|                    |                          | Kolmogorov-Smirnov <sup>a</sup> |    |       | Shapiro-Wilk |    |       |
|                    |                          | Statistic                       | df | Sig.  | Statistic    | df | Sig.  |
| Barthel            | on discharge of hospital | 0,186                           | 17 | 0,119 | 0,843        | 17 | 0,009 |
| Barthel            | 1 years after discharge  |                                 | 17 |       |              | 17 |       |

a. Lilliefors Significance Correction
